# Supplementary material
Source: PubMed Central journal article supplement (PMC8076094)
Supplement: NIHMS1678415-supplement-Supplementary_Figure_1.pdf [file NIHMS1678415-supplement-Supplementary_Figure_1.pdf]

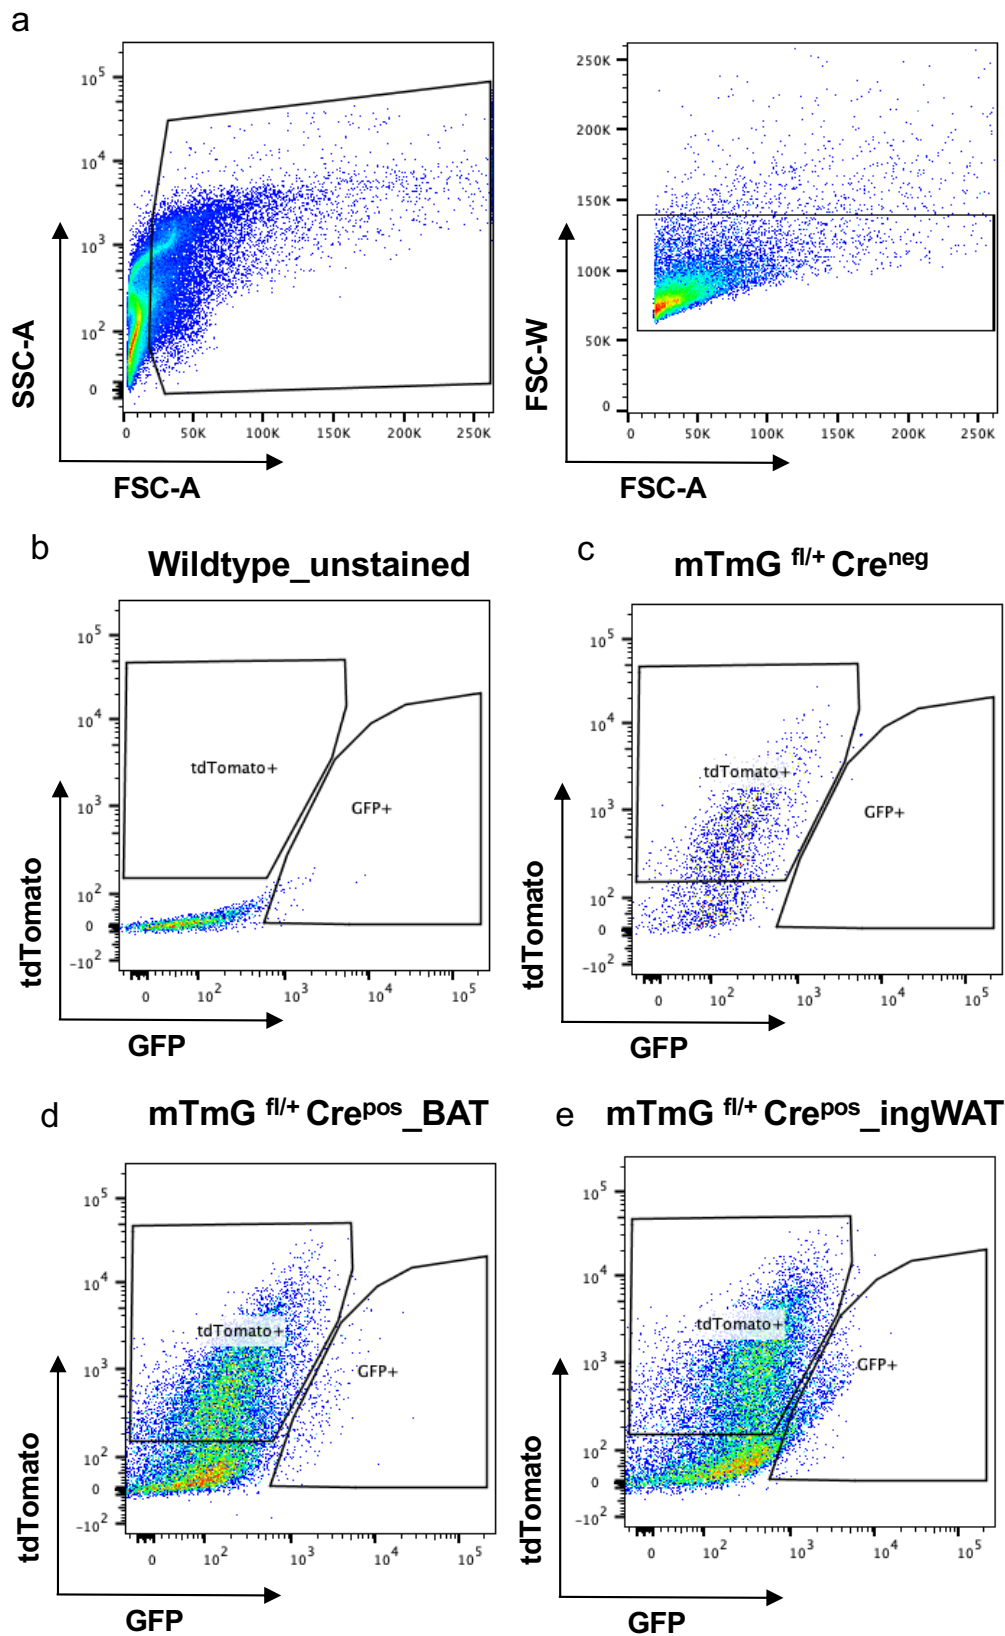

**Supplementary Figure 1. Flow cytometry analysis of adipocytes, related to Figure 2.** Representative flow cytometry analysis of adipocytes derived from *Trpv1<sup>cre</sup> Rosa26<sup>mTmG</sup>* mice. (a) Gating strategy for isolating adipocytes from BAT-SVF based on side scatter (SSC) and forward scatter (FSC). (b-e) GFP and tdTomato fluorescence in adipocytes of (b) unstained wildtype, (c) *mTmG<sup>fl/+</sup> Cre<sup>neg</sup>* control, (d) BAT and (e) ingWAT from the *mTmG<sup>fl/+</sup> Cre<sup>pos</sup>*.
